# Supplementary material for: Third-Generation Antipsychotics and Lurasidone in The Treatment of Substance-Induced Psychoses: A Narrative Review
Source: Preprints.org preprint supplement (doi:10.20944/preprints202401.1713.v1), 2024-01-23
Supplement: Supplementary file 3 [file supplementary:table%204%20rev.pdf]

| REFS                      | PSICHIATRIC<br>DIAGNOSIS           | KEY CONCEPT                                                            | POPULATION | SUBSTANCE<br>RELATED<br>DIAGNOSIS | SAMPLE | RESULTS                                                                                                                                            |
|---------------------------|------------------------------------|------------------------------------------------------------------------|------------|-----------------------------------|--------|----------------------------------------------------------------------------------------------------------------------------------------------------|
| <b>Ricci et al., 2022</b> | Cannabis induced psychosis         | Efficacy of lurasidone in cannabis induced psychosis                   | 4          | Cannabis                          | Human  | Lurasidone showed improvements in both positive and negative symptomatology in four patients. The dosage of lurasidone ranged from 74 mg to 111 mg |
| <b>Mole et al., 2022</b>  | Cannabis, LSD<br>Induced psychosis | Efficacy of lurasidone in a polyabuser patient with psychotic symptoms | 1          | Cannabis<br>LSD<br>Alcohol        | Human  | Beneficial use of lurasidone (40 mg/die) in a 14-year-old with LSD, cannabis induced psychosis                                                     |

**TABLE 4) MAIN FINDINGS OF RETRIEVED STUDIES IN LURASIDONE**
