# Supplementary material for: Third-Generation Antipsychotics and Lurasidone in The Treatment of Substance-Induced Psychoses: A Narrative Review
Source: Preprints.org preprint supplement (doi:10.20944/preprints202401.1713.v1), 2024-01-23
Supplement: Supplementary file 4 [file supplementary:table%205.pdf]

| ANTIPSYCHOTIC DRUG   | MECHANISM OF ACTION                                                                                                                                                                                                                         | THERAPEUTIC REGIMEN                                                        | CURRENT EVIDENCE                                                                                                         | SIDE EFFECTS                                                                                                                                                           |
|----------------------|---------------------------------------------------------------------------------------------------------------------------------------------------------------------------------------------------------------------------------------------|----------------------------------------------------------------------------|--------------------------------------------------------------------------------------------------------------------------|------------------------------------------------------------------------------------------------------------------------------------------------------------------------|
| <b>Aripiprazole</b>  | Partial agonism at dopamine D2 and serotonin 5-HT1A receptors; Antagonism at serotonin 5-HT2A receptors; Blockade of serotonin type 5-HT2C and 7 receptors                                                                                  | Orally: 15-30 mg/day; available as a depot formulation (400 mg fl/28 days) | Significant improvement in positive and negative symptoms, reduction in substance use and craving (cocaine and cannabis) | Better safety profile than other AP in terms of extrapyramidal side effects, sedation, and metabolic changes. Akathisia and agitation are reported (Wang et al., 2016) |
| <b>Cariprazine</b>   | Partial agonist at the dopamine (DA) D2 and D3 receptors and serotonin 5-HT1A receptors, and as an antagonist at the 5-HT2B receptors.                                                                                                      | Orally: 1.5-3 mg/day;                                                      | Improvement in substance induced psychosis (psychostimulant, cocaine and methamphetamine)                                | Good safety profile. No reported side effects. Only insomnia treated with benzodiazepines (Ricci et al., 2022)                                                         |
| <b>Brexpiprazole</b> | Partial agonism of 5-HT <sub>1A</sub> and D <sub>2</sub> receptors and antagonism of 5-HT <sub>2A</sub> . Brexpiprazole binds with high affinity to numerous monoaminergic receptors encompassing D2, D3, 5-HT1A, 5-HT2A, 5-HT2B, and 5-HT7 | Orally: 2-4 mg/day;                                                        | Improvement cannabis withdrawal psychosis. modulator of dopamine-dependent behaviors during opioid use in rats           | Good safety profile. No reported side effects.                                                                                                                         |
| <b>Lurasidone</b>    | Full antagonist at dopamine D2 and serotonin 5-HT2A and 5-HT7 receptors                                                                                                                                                                     | Orally: 40-160 mg/day;                                                     | Improvement in cannabis induced psychotic symptoms and LSD                                                               | Good safety profile. Only sedation reported (Ricci et al., 2022)                                                                                                       |

**Table 5. Characteristics of antipsychotic drugs resulted to be used in Substance Induced Psychosis.**
